# Supplementary material for: TPF induction chemotherapy increases PD-L1 expression in tumour cells and immune cells in head and neck squamous cell carcinoma
Source: PubMed Central journal article supplement — ESMO Open. 2018 Jan 9;3(1):e000257. doi: 10.1136/esmoopen-2017-000257 (PMC5761289; doi:10.1136/esmoopen-2017-000257), 2018-01-09
Supplement: esmoopen-2017-000257supp002.pdf [file esmoopen-2017-000257supp002.pdf]

**Supplementary Table 1: Correlation between PD-L1 induction and best response.**

|                            | Increase of PD-L1 expression |            | Total (n=21) | p-value (chi <sup>2</sup> ) |
|----------------------------|------------------------------|------------|--------------|-----------------------------|
|                            | No (n=5)                     | Yes (n=16) |              |                             |
| Best Response (RECIST 1.1) |                              |            |              | 0.52                        |
| Stable disease             | 2 (40 %)                     | 4 (25 %)   | 6 (29 %)     |                             |
| Response (CR + PR)         | 3 (60 %)                     | 12 (75 %)  | 15 (71 %)    |                             |

**Legend.**

Of the 21 patients, 15 (71%) responded to TPF induction (14 partial response and 1 complete response). An increase in PD-L1 expression was observed in 12 patient's tumours (57 % of all patients and 80 % of responders). Only three patients with response did not have any tumour increase of PD-L1 expression. No correlation could be found statistically significant between PD-L1 induction after chemotherapy and response (chi<sup>2</sup> test;  $p=0.52$ ).

Stable disease: change in tumour size between +20% and -30% as compared to baseline;  
Partial Response (PR): decrease in tumour size >30%; Complete Response (CR): complete disappearance of all visible lesions.
